# Supplementary material for: Enhanced thermoelectric performance in Sb–Br codoped Bi2Se3 with complex electronic structure and chemical bond softening
Source: Royal Society of Chemistry journal article supplement (doi:10.1039/d1ra08726f), 2022-01-01
Supplement: d1ra08726f1.pdf [file d1ra08726f1.pdf]

Supporting Information

Enhanced thermoelectric performance in Sb-Br codoped  $\text{Bi}_2\text{Se}_3$  with complex  
electronic structure and chemical bond softening

Ju Zhang, Shiqi Zhong, and San-Huang Ke\*

MOE Key Laboratory of Microstructured Materials, School of Physics Science  
and Engineering, Tongji University, 1239 Siping Road, Shanghai 200092, China

E-mail: [shke@tongji.edu.cn](mailto:shke@tongji.edu.cn)

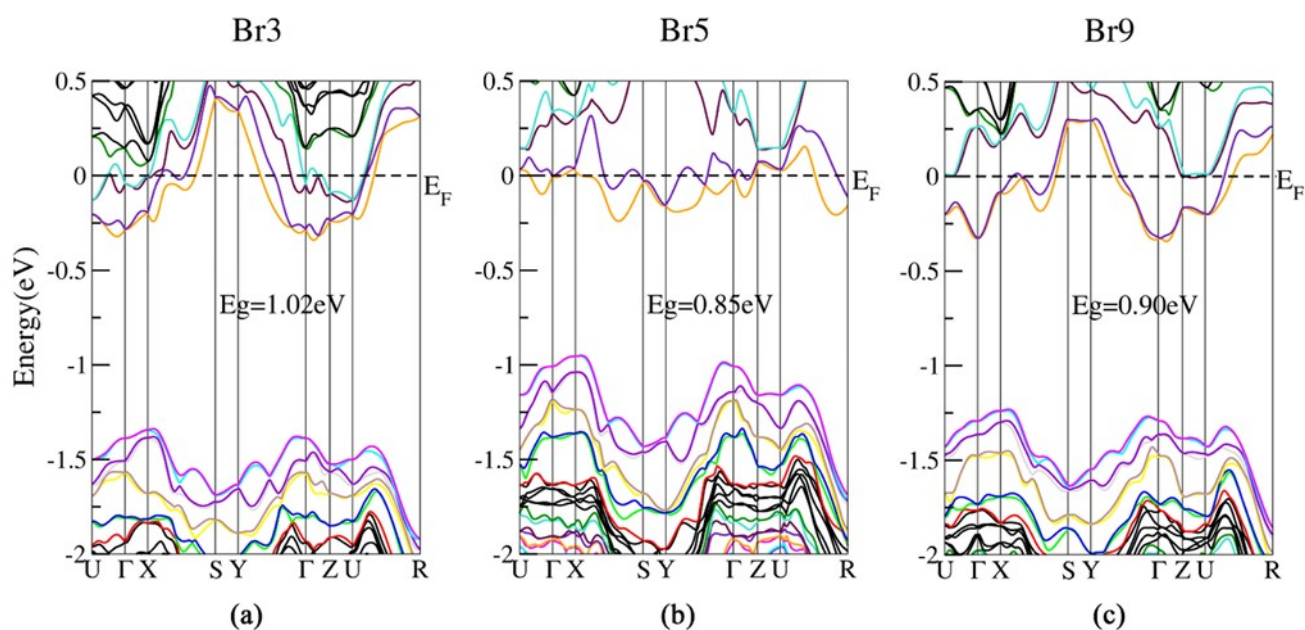

FIG. S1. Calculated electronic band structures of  $\text{BiSb}(\text{Se}_{0.92}\text{Br}_{0.08})_3$  with Br doped  
at three nonequivalent sites.

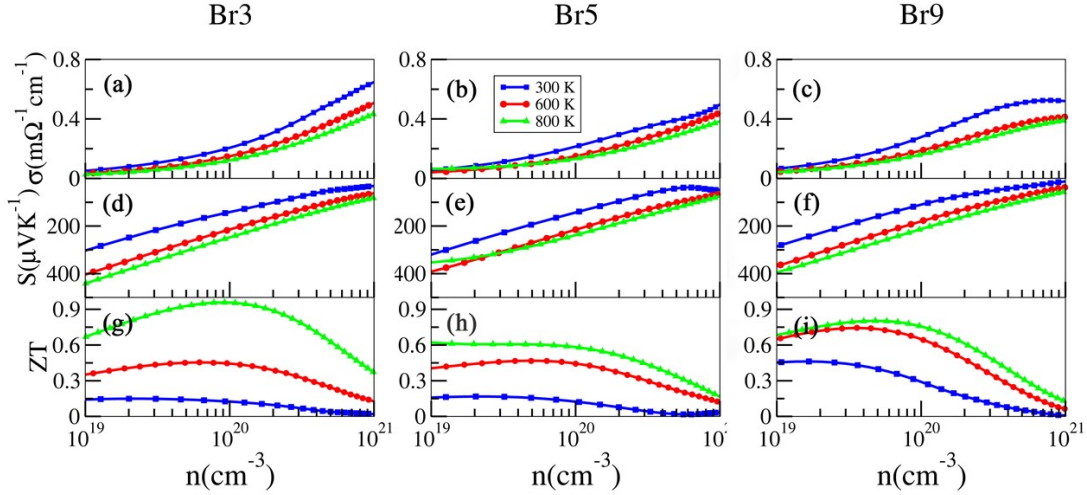

FIG. S2 Calculated transport properties of n-type  $\text{BiSb}(\text{Se}_{0.92}\text{Br}_{0.08})_3$  with Br doped at three nonequivalent sites, respectively.

Calculation method: First-principles calculations within the density functional theory (DFT) have been performed using the projector-augmented wave (PAW) method [1], as implemented in the Vienna Ab-initio Simulation Package (VASP) [2]. The exchange-correlation is treated in the generalized gradient approximation (GGA) in the version of Perdew-Burke-Ernzerhof (PBE) [3]. The cutoff energy is set to be 500 eV for all calculations. A Monkhorst-Pack  $\Gamma$ -centered  $5 \times 15 \times 5$  k mesh is used for the Brillouin zone sampling. The atomic structures, including lattice parameters and atomic positions, are fully relaxed until the maximum residual ionic force is below 0.001 eV/Å, and the total energy difference is converged to within  $10^{-8}$  eV. The spin-orbit coupling (SOC) are considered in our calculations due to the heavy element.

## References

- [1] P. E. Blöchl, Projector Augmented-Wave Method. *Phys. Rev. B* 50, 17953 (1994).
- [2] G. Kresse and J. Furthmuller, Efficiency of Ab-Initio Total Energy Calculations for Metals and Semiconductors Using a Plane-Wave Basis Set. *Comput. Mater. Sci.* 6, 15 (1996).
- [3] H. J. Monkhorst and J. D. Pack, Special Points for Brillouin-Zone Integrations. *Phys. Rev. B* 13, 5188 (1976).
